# Supplementary material for: Nitrogen-enriched multimodal porous carbons for supercapacitors, fabricated from inclusion complexes hosted by urea hydrates
Source: Royal Society of Chemistry journal article supplement (doi:10.1039/c2ra20421e), 2012-01-01
Supplement: c2ra20421e.pdf [file c2ra20421e.pdf]

# **Nitrogen-enriched multimodal porous carbons for supercapacitors, fabricated from inclusion complexes hosted by urea hydrates**

**Young Soo Yun,<sup>†</sup> Jinyong Shim,<sup>‡</sup> Yongsug Tak,<sup>‡</sup> and Hyoung-Joon Jin<sup>\*,†</sup>**

<sup>†</sup>Department of Polymer Science and Engineering, Inha University, Incheon 402-751,  
Korea

<sup>‡</sup>Department of Chemical Engineering, Inha University, Incheon 402-751, Korea

---

\*Corresponding author. Tel/Fax: +82-32-860-7483/ +82-32-865-5178. E-mail address:  
hjjin@inha.ac.kr.

## Supplementary information

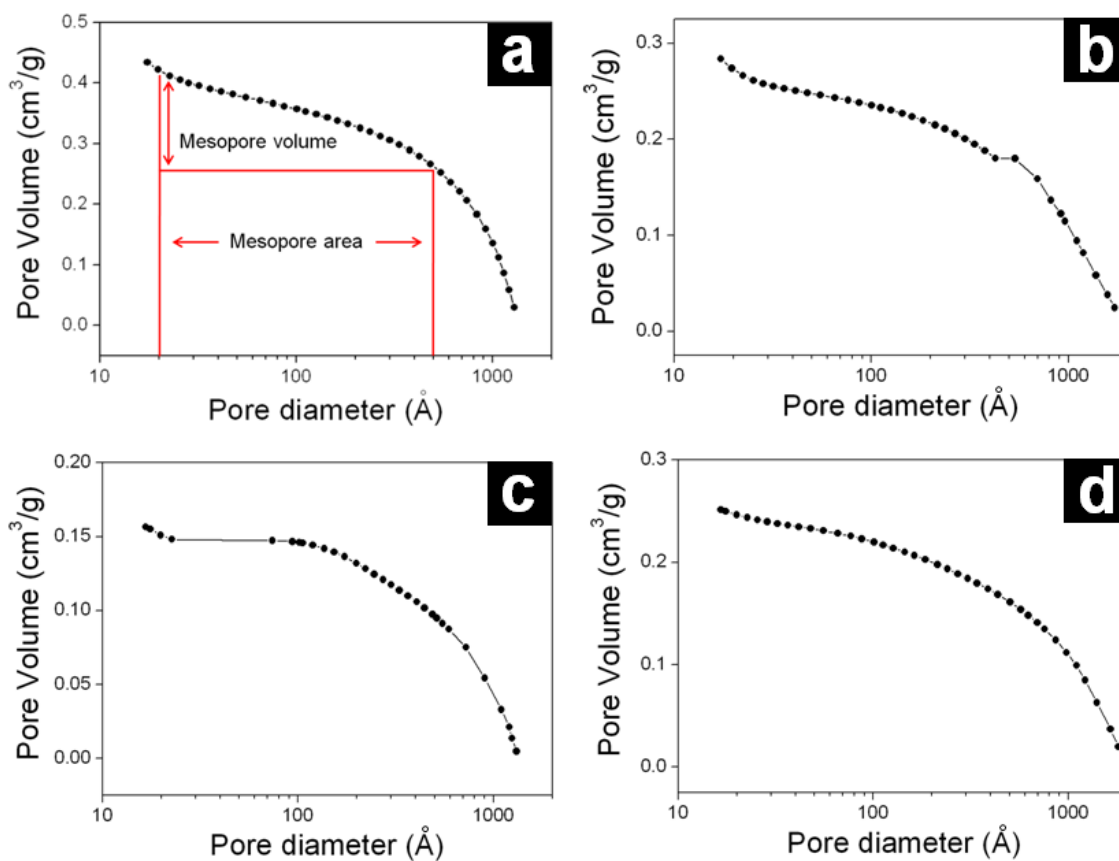

**Fig. S1.** BJH adsorption cumulative pore volumes of (a) NMPC-4 wt%, (b) NMPC-NaOH14 wt%, (c) NMPC-urea18 wt% and (d) NMPC-6 wt%.

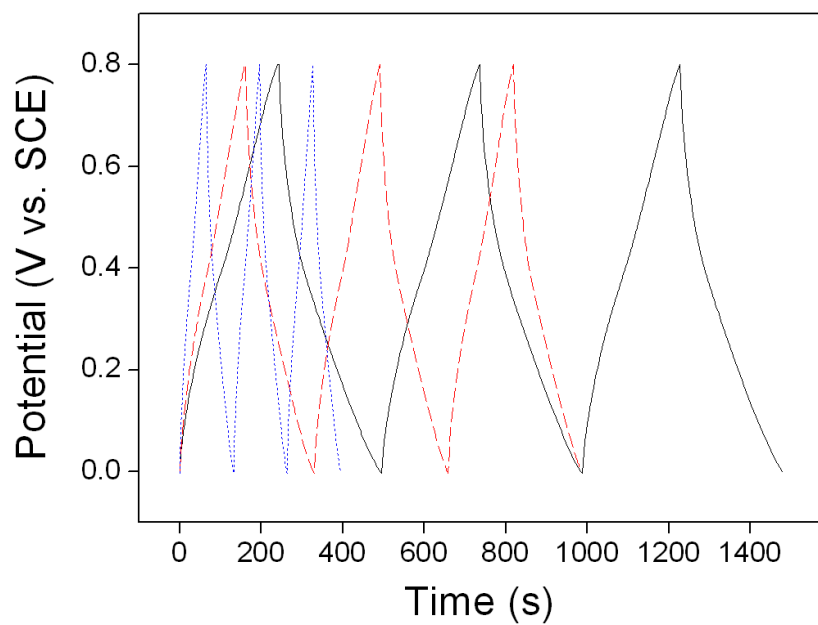

**Fig. S2.** Galvanostatic charge/discharge curves of NMPC-6 wt% in the potential window of 0 to 0.8 V at current densities of 0.1 (solid line), 1.1 (dash line) and 2.7 (dot line) A/g.

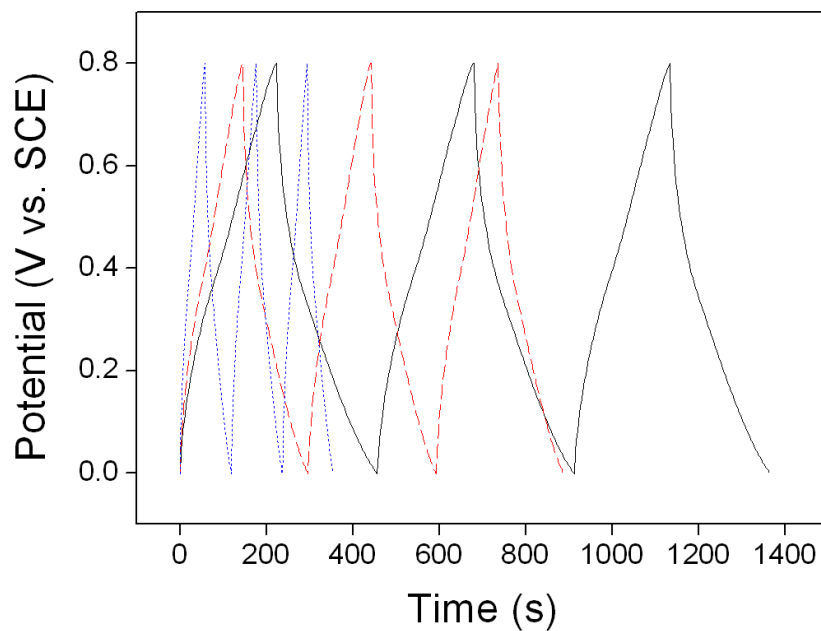

**Fig. S3.** Galvanostatic charge/discharge curves of NMPC-6 wt% TT in the potential window of 0 to 0.8 V at current densities of 0.1 (solid line), 1.1 (dash line) and 2.7 (dot line) A/g.

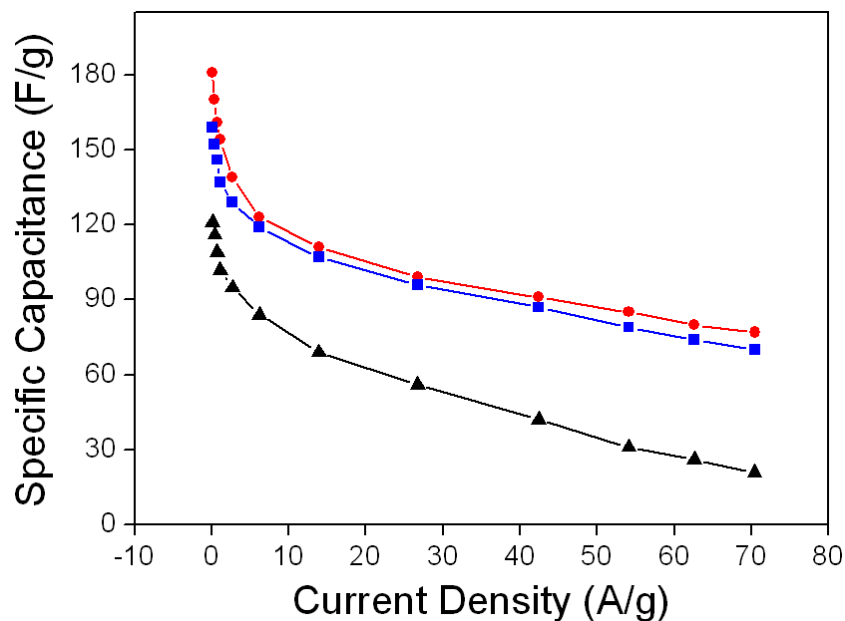

**Fig. S4.** Specific capacitances of NMPC-6 wt% (red circles), NMPC-6 wt% TT (blue squares) and Ketjen Black (black triangles) at various current densities, measured in 1 M H<sub>2</sub>SO<sub>4</sub> aqueous electrolyte.

When the current density was increased from 0.1 to 70 A/g, the specific capacitance of NMPC-6 wt% decreased from 181 to 77 F/g. When the current density was increased from 1 to 25 A/g, the capacitance retentions of NMPC-6 wt%, NMPC-6 wt% TT and Ketjen Black were 64, 70 and 54%, respectively, and as the current density was further increased to 50 A/g, the capacitance retentions were 55, 58 and 26%, respectively. The rate capabilities of the NMPCs were better than that of Ketjen Black, due to the interconnected and opened meso/macroporous structure of the NMPCs.

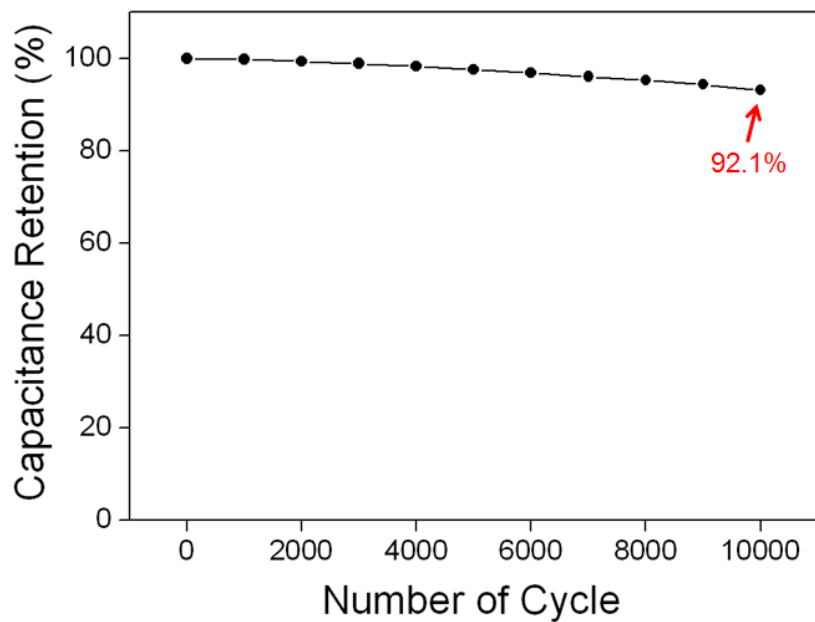

**Fig. S5.** Variation of the specific capacitance of NMPC-6 wt% as a function of the cycle number measured from galvanostatic charge/discharge measurement at a current density of 5 A/g in a 1 M H<sub>2</sub>SO<sub>4</sub> aqueous solution.
